# Supplementary material
Source: PubMed Central journal article supplement (PMC6318001)
Supplement: NIHMS1509936-supplement-1.pdf [file NIHMS1509936-supplement-1.pdf]

# Supplementary Information

## **Multiplex Three-Dimensional Mapping of Macromolecular Drug Distribution in the Tumor Microenvironment**

Steve Seung-Young Lee, Vytautas P. Bindokas, Stephen J. Kron

Correspondence to Stephen J. Kron

Email: [skron@uchicago.edu](mailto:skron@uchicago.edu)

### **This PDF file includes:**

Supplementary tables S1-2

Supplementary figures S1-6

Captions for supplementary videos 1 to 7

### **Other supplementary materials for this manuscript include the following:**

Supplementary videos 1-7

**Supplementary Table S1.** Fluorescent antibody conjugation

| Antibody                              | Clone   | Source        | Antibody Concentration      | Fluorescent Dye        | Added Dye* |
|---------------------------------------|---------|---------------|-----------------------------|------------------------|------------|
| Anti-rat Her2                         | 7.16.4  |               | 0.6 mg/0.5 ml               | DyLight™ 488 NHS ester | 140 µg     |
|                                       |         |               | 1 mg/0.5 ml ( <i>i.v.</i> ) | DyLight™ 594 NHS ester | 70 µg      |
| Anti-reticular fibroblasts and fibres | ER-TR7  | BioXCell      | 1 mg/1 ml                   | DyLight™ 680 NHS ester | 200 µg     |
| Anti-CD8                              | 2.43    | BioXCell      | 0.5 mg/0.5 ml               | DyLight™ 550 NHS ester | 100 µg     |
| Anti-SMA                              | 1A4     | Sigma-Aldrich | 0.1 mg/0.1 ml               | DyLight™ 488 NHS ester | 20 µg      |
| Anti-CD31                             | MEC13.3 | Biolegend     | 0.5 mg/1 ml                 | DyLight™ 633 NHS ester | 75 µg      |
| Anti-EGFR                             | 528     | BioXCell      | 1 mg/0.5 ml ( <i>i.v.</i> ) | DyLight™ 594 NHS ester | 70 µg      |
| IgG Isotype                           | C1.18.4 | BioXCell      | 1 mg/0.5 ml ( <i>i.v.</i> ) | DyLight™ 680 NHS ester | 70 µg      |
| Anti-PD-L1                            | 10F.9G2 | BioXCell      | 1 mg/0.5 ml ( <i>i.v.</i> ) | DyLight™ 594 NHS ester | 70 µg      |
|                                       |         |               | 0.4 mg/0.2 ml               | DyLight™ 680 NHS ester | 70 µg      |

\*10 mg/ml in dimethylformamide

(*i.v.*) Intravenous injection for distribution study

**Supplementary Table S2.** Fiji macros for 3D image processing and analysis

| <b>Macro</b>                 | <b>Function</b>                                                          |
|------------------------------|--------------------------------------------------------------------------|
| <i>LIFtile-restitcher</i>    | align and stitch 3D mosaics for multi-channel images (0-999 image tiles) |
| <i>HPRstack2ConstantMean</i> | compensate for depth-related intensity losses                            |
| <i>composite big aligner</i> | automate alignment and registration of the stitched macrosection images  |
| <i>closeZvoids</i>           | merged top slice and bottom slice of the macrosections                   |
| <i>hyprBKGDfix</i>           | clear background around tumor and tissue                                 |
| <i>vessel extractor</i>      | automate segmentation of the blood vessels                               |

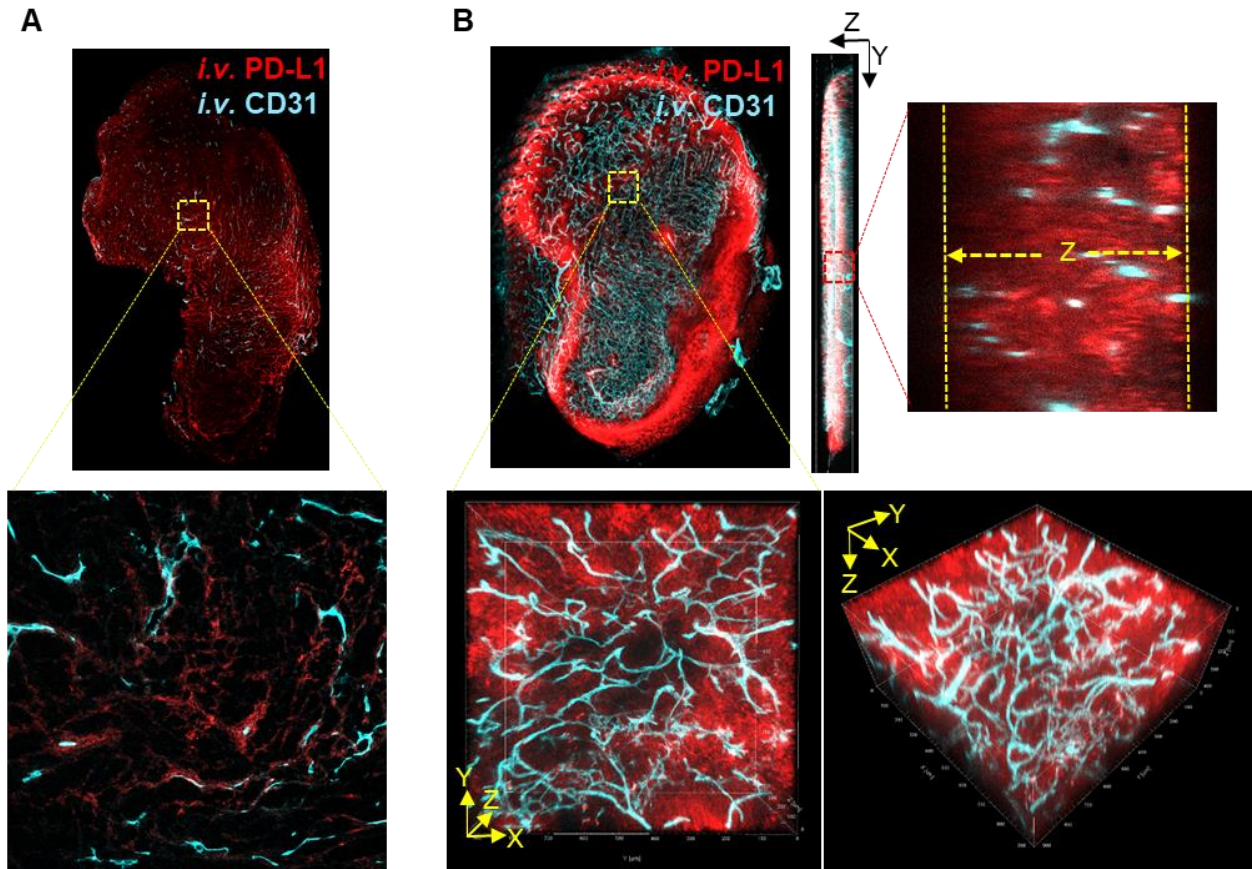

**Supplementary Figure S1.** Comparison of 2D and 3D images of anti-PD-L1 antibody drug distribution in tumor at 12 h post injection. **A**, 2D survey (top) and magnified (bottom) images of anti-PD-L1 antibody drug (red) and blood vessels (cyan) in 10  $\mu\text{m}$  thick cryosection obtained from a divided TUBO tumor. **B**, 3D survey (top), lateral (right), optical Z cross-section (far right), and magnified (bottom) images of a 400  $\mu\text{m}$  macrosection obtained from the divided TUBO tumor.

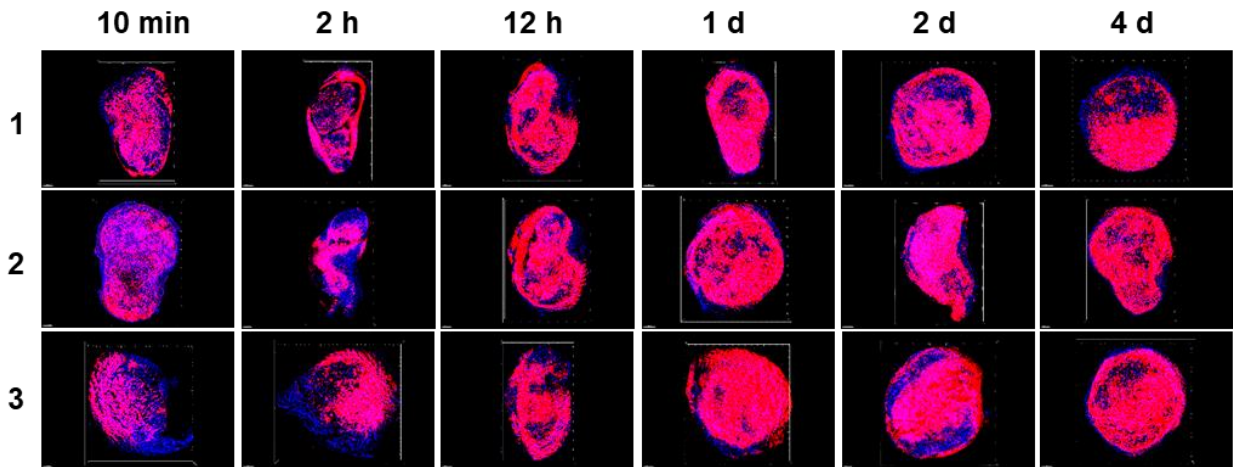

**Supplementary Figure S2.** 3D spatial pharmacokinetics of anti-PD-L1 antibody in tumor macrosections. Three macrosections from three different tumors for each time point were analyzed for determining 3D tumor penetration distance of anti-PD-L1 antibody drug (red) away from CD31<sup>+</sup> blood vessels (blue) in Fig. 2E and macrosection volume coverage (%) in Fig. 2F.

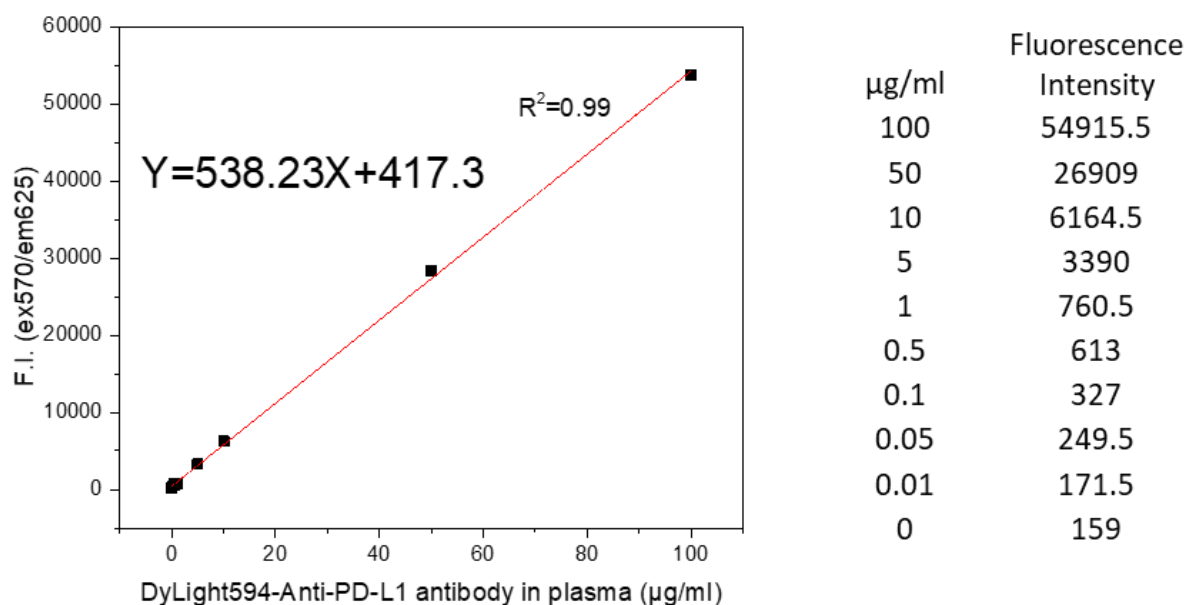

**Supplementary Figure S3.** Fluorescence calibration curve for anti-PD-L1 antibody concentration in plasma. Fluorescence intensities (F.I.) of different concentrations of DyLight594-anti-PD-L1 (100-0.01 µg/ml) in plasma were measured at 570 nm excitation and 625 nm emission, and fitted to a linear equation.

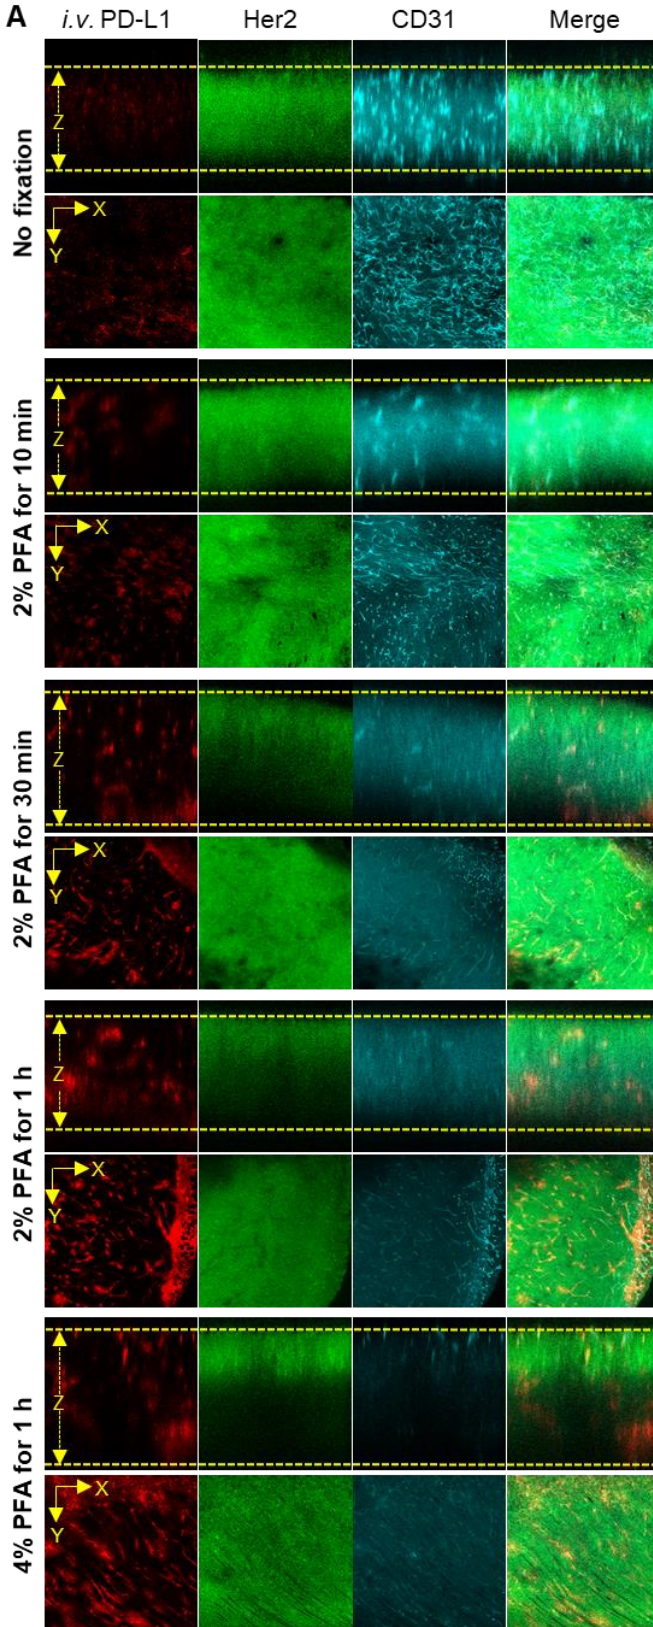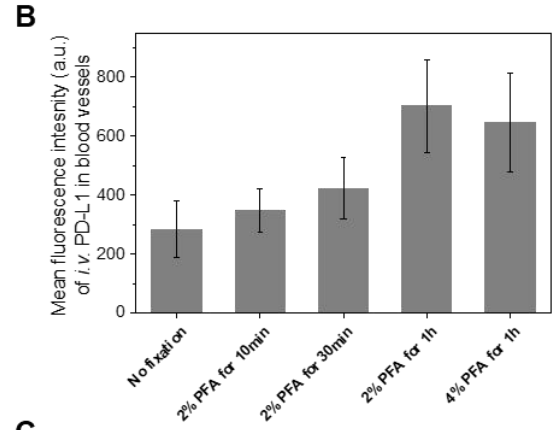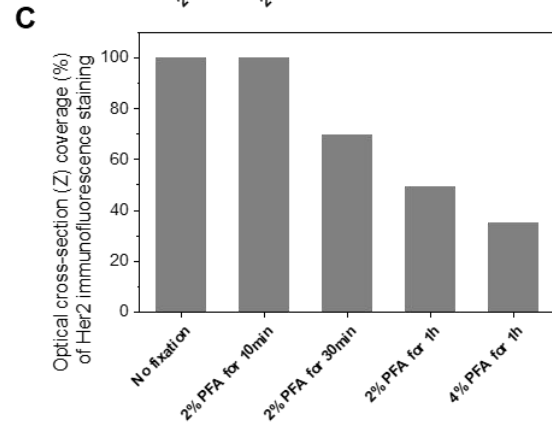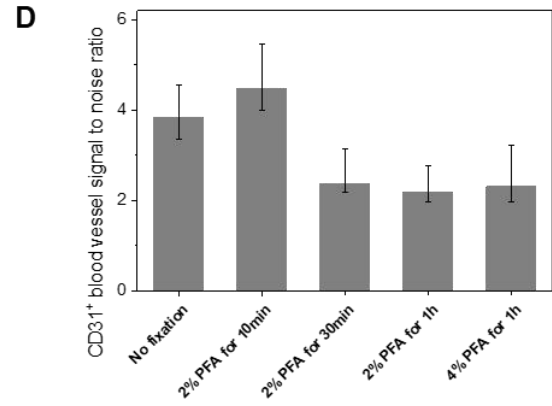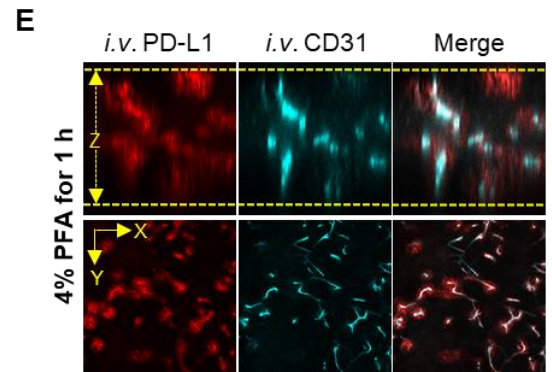



**Supplementary Figure S4.** Optimizing fixation and immunostaining conditions for 3D imaging macromolecular drug distribution in 400  $\mu\text{m}$  thick tumor macrosections. **A**, Optical cross-section (Z) scanning (top) and 2D imaging (bottom) of optically cleared tumor macrosections (400  $\mu\text{m}$  thickness). Fluorescent anti-PD-L1 antibody (red) was intravenously (*i.v.*) injected into TUBO tumor bearing mice, and the tumors were excised at 10 min post injection of anti-PD-L1 antibody, fixed with paraformaldehyde (PFA) solution in different conditions, sectioned, and immunostained for Her2<sup>+</sup> cancer cells (green) and CD31<sup>+</sup> blood vessels (cyan). **B**, Relative quantification of fluorescence intensity of anti-PD-L1 antibody localized in CD31<sup>+</sup> blood vessels in the 2D images of macrosections fixed in the different conditions (n=9, three random 2D areas in three different macrosections, mean  $\pm$  SD). **C**, Relative quantification of anti-Her2 antibody immunostaining efficiency for the macrosections fixed in different conditions. The coverage (%) of thresholded Her2 stained area in the optical cross-section (Z) scanning images as shown in A. **D**, Relative quantification of the signal-to-noise ratio of CD31-stained blood vessels in the 2D optical section images (n=9, three random 2D areas in three different macrosections, mean  $\pm$  SD). **E**, Optical cross-section (Z) scanning (top) and 2D imaging (bottom) of an optically cleared macrosection that was derived from the tumor *in vivo* labeled for blood vessels by intravenous (*i.v.*) injection of fluorescent anti-CD31 antibody and fixed with 4% paraformaldehyde (PFA) solution for 1 h. The signal-to-noise ratio of CD31-positive blood vessels was 9.95.



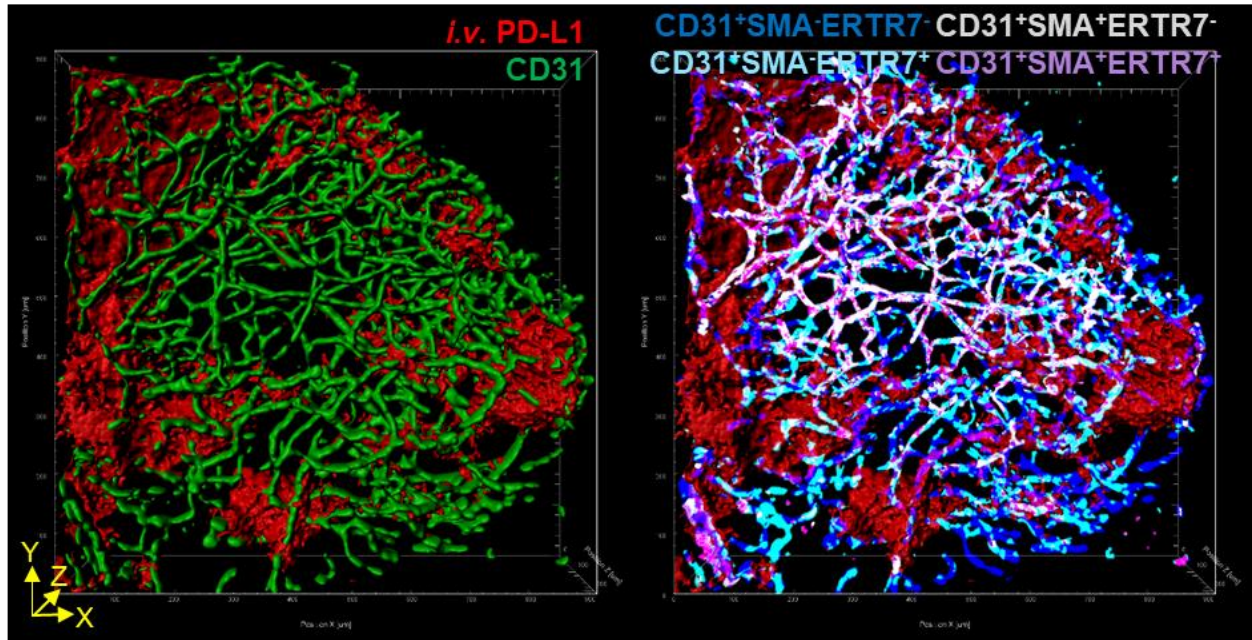

**Supplementary Figure S5.** 3D mapping of different types of microvessels and their permeability with regards to anti-PD-L1 antibody drug penetration into tumor.

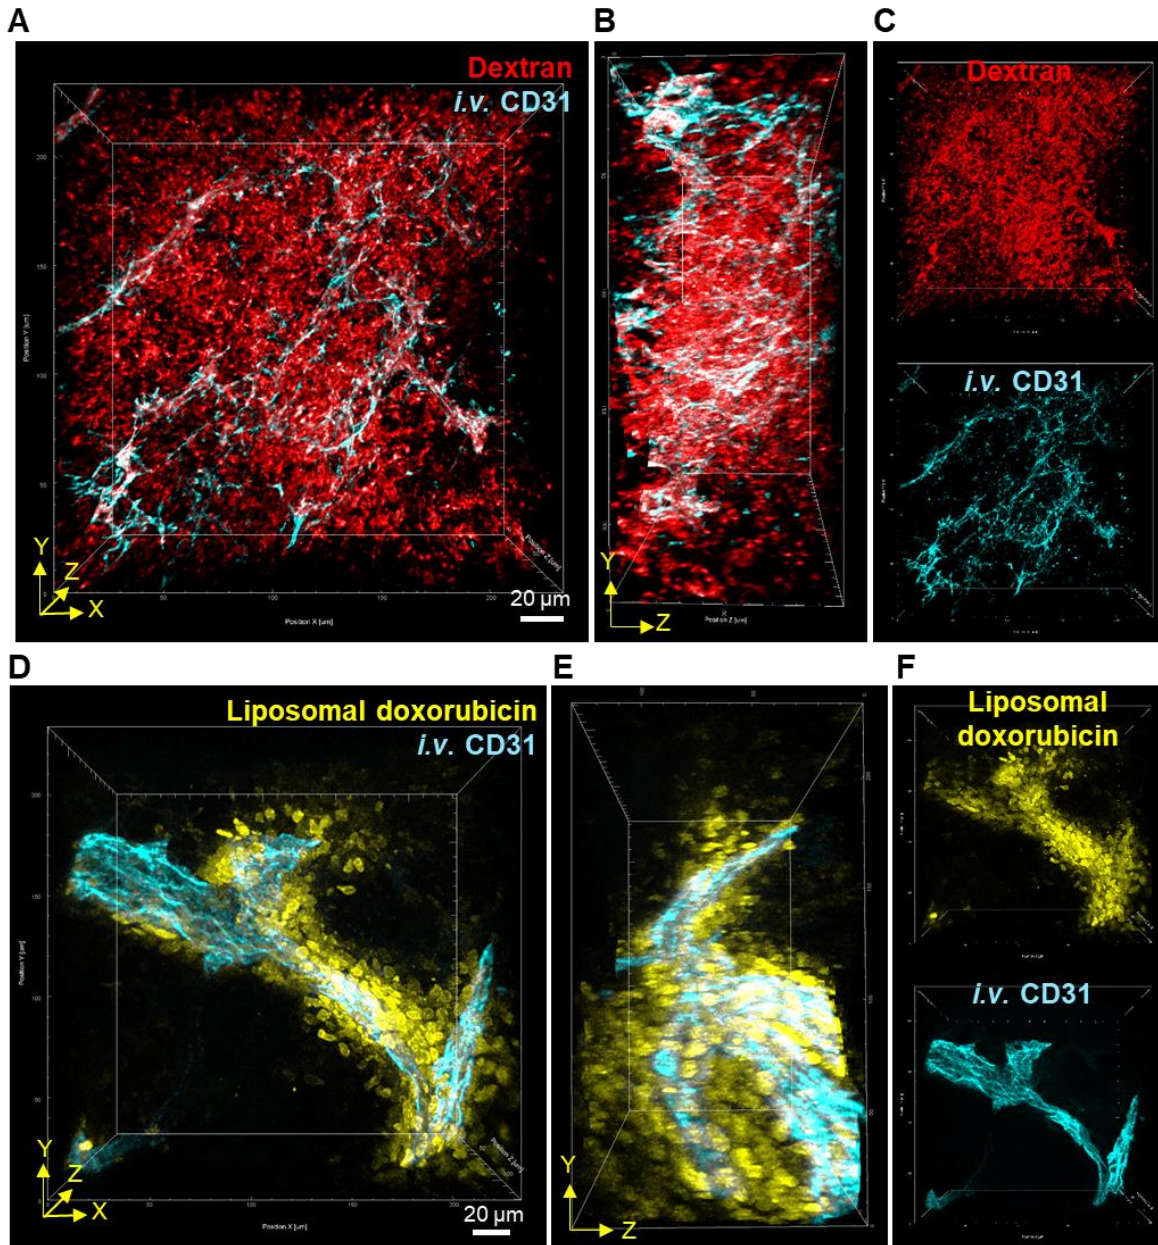

**Supplementary Figure S6.** 3D visualization of macromolecular drug distribution in tumors. **A, D,** High resolution 3D images of dextran (red) and doxorubicin (yellow)-loaded liposome (Doxil) distribution in mouse 4T1 tumors at 30 min and 4 h post injection, respectively. The tumor blood vessels (cyan) were *in vivo* labeled by intravenous (*i.v.*) injection of fluorescent anti-CD31 antibody. Scale bar: 20  $\mu\text{m}$ . **B, E,** Lateral view of the 3D images and **C, F,** channel images for macromolecular drugs and tumor blood vessels.

## **Captions for supplementary videos 1 to 7**

**Supplementary Video 1.** Tomographic visualization of anti-PD-L1 antibody drug distribution in reconstructed TUBO tumor image with multiple orthogonal planes. *i.v.* PD-L1 (red) and *i.v.* CD31 (cyan).

**Supplementary Video 2.** High resolution 3D rendering of vascular penetration of anti-PD-L1 antibody drug in TUBO tumor. *i.v.* PD-L1 (red) and *i.v.* CD31 (cyan).

**Supplementary Video 3.** 3D rendering of anti-PD-L1 antibody distribution in the tumor microenvironment at 10 min after injection. Her2 (green), CD8 (yellow), *i.v.* PD-L1 (red), CD31 (cyan), and PD-L1 (magenta).

**Supplementary Video 4.** 3D rendering of different types of microvessels and their permeability with regards to anti-PD-L1 antibody drug penetration into tumor. SMA (green), CD31 (cyan), ER-TR7 (magenta), and *i.v.* PD-L1 (red).

**Supplementary Video 5.** 3D rendering of anti-Her2 and IgG isotype antibody distribution in the BALB-NeuT tumor nest at 1 h after injection. *i.v.* Her2 (green), *i.v.* IgG (red), and *i.v.* CD31 (cyan).

**Supplementary Video 6.** 3D rendering of anti-EGFR and IgG isotype antibody distribution in the lung cancer PDX tumor nest at 1 h after injection. *i.v.* EGFR (green), *i.v.* IgG (red), and *i.v.* CD31 (cyan).

**Supplementary Video 7.** 3D rendering of doxorubicin delivery to tumor in mouse treated with PEGylated liposomal doxorubicin (Doxil), showing cell uptake at 4 h after injection. Doxorubicin bound to nuclear DNA (yellow) and *i.v.* CD31 (cyan).
